# Supplementary material for: Practitioners’ perceptions of biodiversity-relevant criteria for solar suitability analyses in the United States
Source: Research Square preprint supplement (doi:10.21203/rs.3.rs-7437180/v1), 2025-09-26
Supplement: Supplementary file 1 [file b5a799df8921b22446f4bbf0.docx]

Supplementary Item 4: Example Jamboard slides from the Delphi prioritization activity


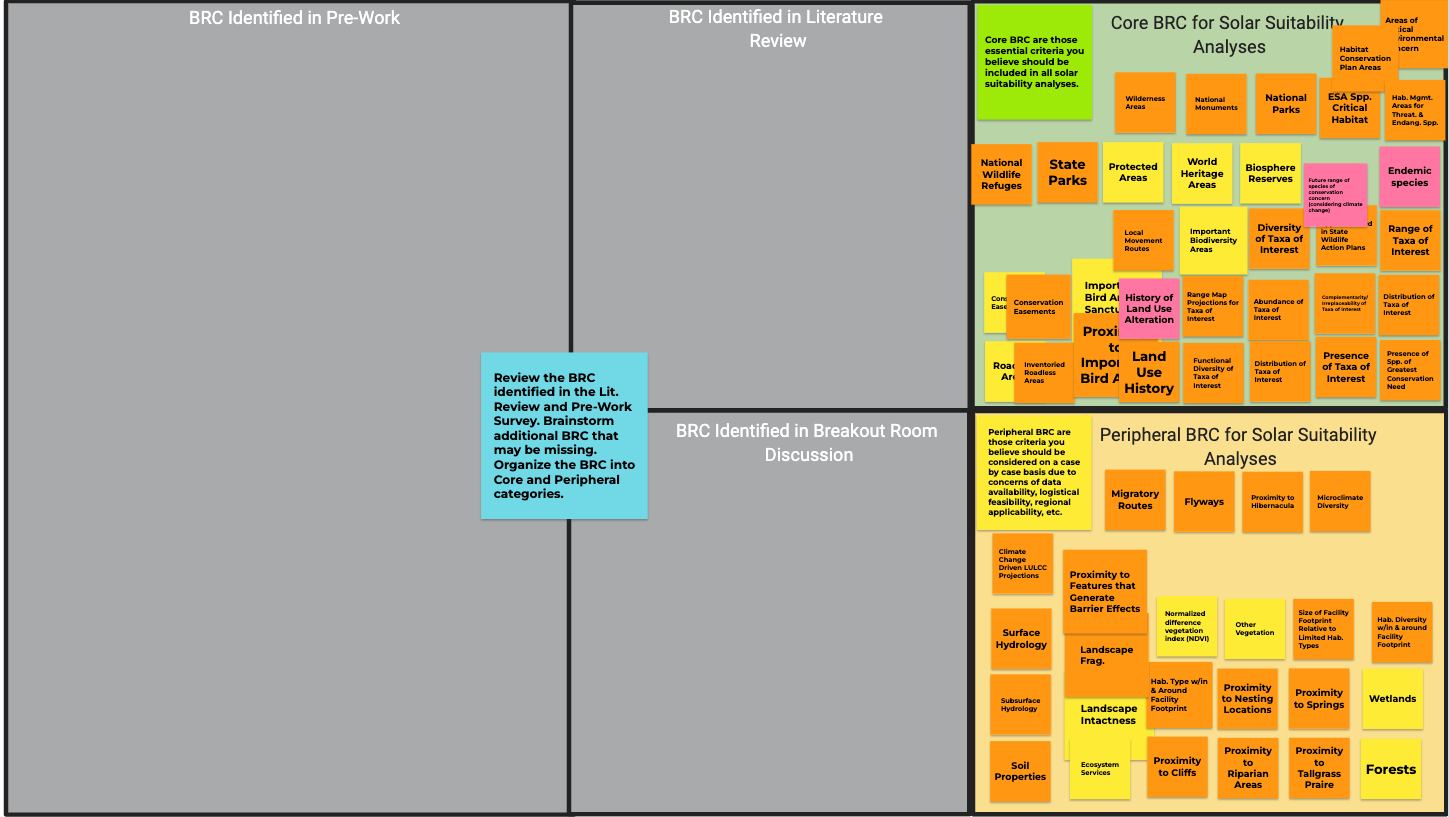


**Figure a** | **Example breakout room Jamboard panel, Delphi round 1**. Practitioners were asked to move the pre-identified literature review criteria (yellow sticky notes) and pre-survey criteria (orange sticky notes) to the “core” criteria box (green, top right) or “peripheral” criteria box (yellow, bottom right). Pink sticky notes represented practitioner-identified biodiversity-relevant criteria.


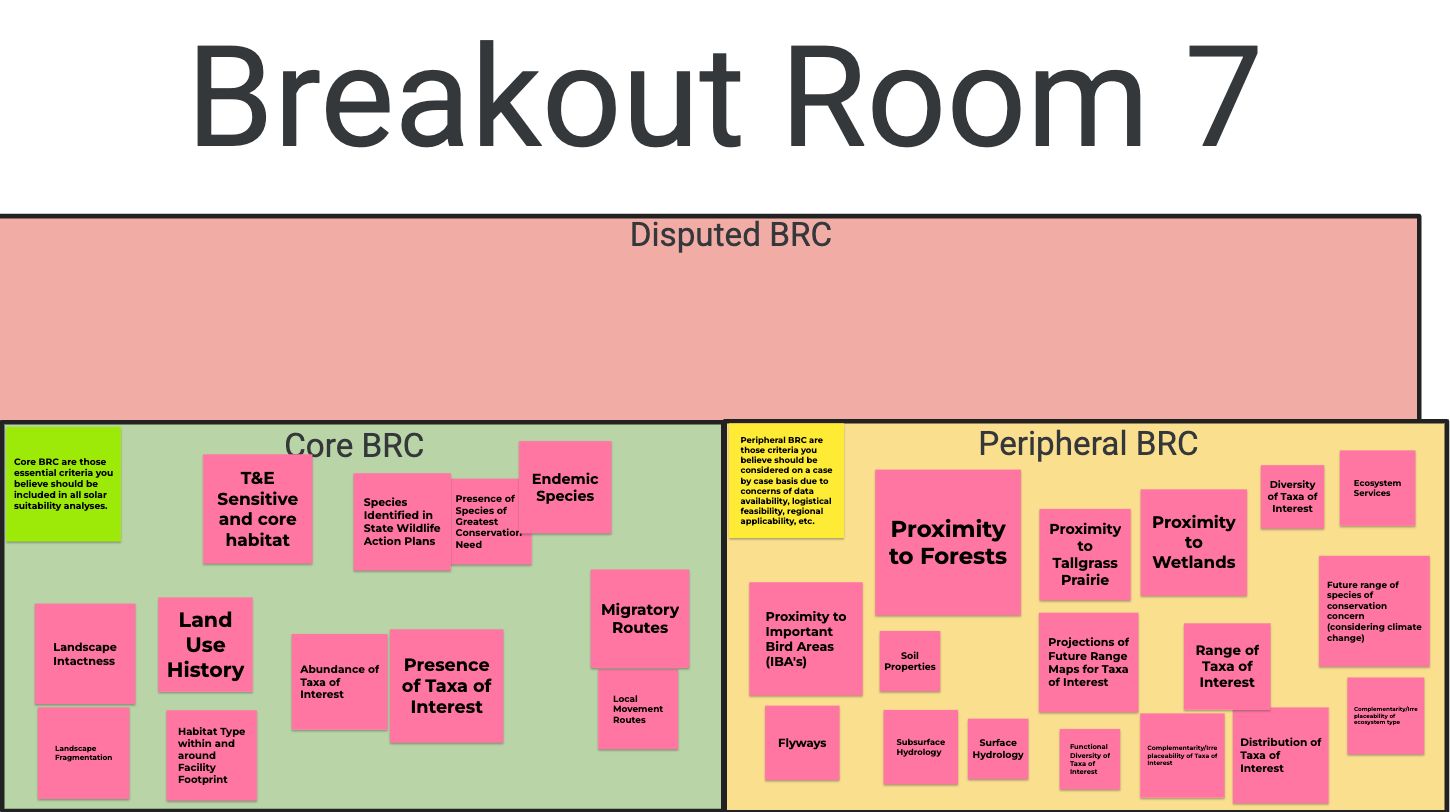


**Figure b** | **Example breakout room Jamboard panel, Delphi round 2**. Practitioners were asked to move the disputed biodiversity-relevant criteria to the “core” criteria box (green, bottom left) or “peripheral” criteria box (yellow, bottom right).
