# Supplementary material for: Practitioners’ perceptions of biodiversity-relevant criteria for solar suitability analyses in the United States
Source: Research Square preprint supplement (doi:10.21203/rs.3.rs-7437180/v1), 2025-09-26
Supplement: Supplementary file 2 [file c2933e49d9623f6c8e9eb7df.docx]

Supplementary Item 3: Summaries of examined US-based solar suitability analysis-related studies

| Solar Suitability Analysis | Study Description |
| --- | --- |
| Ref. 1: Land use trade-offs in decarbonization of electricity generation in the American West. | This paper assessed the quality, cost-effectiveness, and land-use conflict risks of wind and solar energy sites within the Western Electricity Coordinating Council. The findings revealed that less than 4% of suitable solar sites and less than 17% of wind sites are highly energy-productive and cost-effective, while less than 53% of solar sites and less than 85% of wind sites present development risks. Although avoiding land-use conflict-prone areas could increase system costs and complicate strategic siting, state collaboration—particularly among AZ, CA, NV, and UT for solar, and AZ, CO, OR, and WY for wind—could help mitigate land-use conflicts during the clean energy transition |
| Ref. 2: A large scale multi criteria suitability analysis for identifying solar development potential: A decision support approach for the state of Illinois, USA | This study developed a decision-support tool to identify suitable public lands for solar energy development in Illinois. Using geospatial technologies and suitability analysis, the paper evaluated environmental, socioeconomic, and energy productivity factors to support state agency-led solar expansion. The findings emphasize the importance of high-resolution data for large-scale comparisons and site-specific feasibility analysis. Additionally, the study highlights the value of a Planning Support System in facilitating decision-making and enhancing stakeholder engagement |
| Ref. 3: Strategic land use analysis for solar energy development in New York State | This paper addressed the challenge of balancing utility-scale solar energy development with the preservation of agricultural lands in New York, examining suitability using geospatial information systems and multi-criteria analysis techniques. The authors estimate that 44% of utility-scale solar energy development is sited on agricultural land, while 84% of undeveloped land suitable for utility-scale solar energy is agricultural. The authors suggested protecting prime farmland, implementing agrivoltaics, and incentivizing the use of marginal lands to mitigate land use conflicts. It also emphasized the need for community involvement in decision-making to guide effective solar expansion in New York. |
| Ref. 4: Low-impact land use pathways to deep decarbonization of electricity | This study examined land-use trade-offs in meeting California’s clean energy goals. Using ecological and agricultural data from 11 western US states, it modeled environmental constraints on wind, solar, and geothermal energy generation. The findings showed that California can achieve its energy targets; however, development costs, technology choices, and deployment layout depend on land protections and out-of-state resources. Neglecting land availability in energy planning could result in higher economic and environmental costs, and increased uncertainty in achieving climate goals |
| Ref. 5: Analysis of land availability for utility-scale power plants and assessment of solar photovoltaic development in the state of Arizona, USA | This paper investigated suitable land for utility-scale photovoltaic solar development in Arizona using geographical information systems and multiple-criteria analysis to address challenges in meeting the growing demand for clean energy. The study found that less than 2% of Arizona's land is "excellent" for solar, primarily on private or state trust lands. Urbanization poses a major challenge, depleting suitable land and requiring alternative solutions. The researchers posit that Arizona could become a regional energy hub if these lands are developed. |
| Ref. 6: Land-Sparing Opportunities for Solar Energy Development in Agricultural Landscapes: A Case Study of the Great Central Valley, CA, United States | This study explored the potential of deploying solar energy on nonconventional lands to minimize land-use conflicts with agriculture and conservation in the Central Valley, California. Researchers identified 8,415 km² of land, including built environments, salt-affected areas, contaminated land, and water reservoirs, suitable for solar development. Harnessing these areas could generate enough energy to surpass California's projected 2025 electricity demands up to 13x, demonstrating a viable strategy for balancing renewable energy goals with other land-use needs. |
| Ref. 7: Solar energy development impacts on land cover change and protected areas | This study examined the land-use impacts of utility-scale solar energy installations in California, focusing on their siting concerning natural environments, agricultural lands, and protected areas. The research revealed that most utility-scale solar installations are primarily located in shrublands and scrublands, followed by agricultural areas. The authors note that less than 15% of installations are sited in "compatible" areas. The findings highlighted the need for improved integration of energy, food, and conservation goals in solar energy siting decisions to achieve environmental and energy compatibility and harness potential co-benefit opportunities. |
| Ref. 8: Using GIS analytics and social preference data to evaluate utility-scale solar power site suitability | This paper presented a geographical information system-based multiple-criteria analysis for identifying optimal locations for utility-scale solar energy projects in the southwestern United States. The assessment combined proximity raster layers, terrain datasets, and solar irradiance information to create high-resolution maps displaying solar energy potential from "poor" to "excellent" across selected counties. By integrating social preference data collected from surveys, the research demonstrated that considering public acceptance significantly reduces the suitable area for solar development, highlighting the importance of stakeholder engagement in utility-scale solar energy project siting. |
| Ref. 9: Incorporating land-use requirements and environmental constraints in low-carbon electricity planning for California | This paper assessed the land-use implications of 2050 energy decarbonization scenarios for California. Using a spatially explicit model, the study revealed that, while California has sufficient land for solar and geothermal targets, high-quality wind and solar lands often overlap with high conservation value areas. The research concluded that basing siting decisions on environmentally constrained, long-term renewable energy development goals can lead to better conservation outcomes and improved land-use efficiency compared to the existing planning approach. |
| Ref. 10: GIS based analysis for photovoltaic deployment in the Southeast US | This study assessed the technical potential for utility-scale photovoltaic solar deployment in four southeastern U.S. states, comparing results with a prior study. Key findings include: (1) significant land is available for utility-scale solar in all four states, and (2) technical and electricity generation potential (GWh) were calculated for each state using 15% panel efficiency. The research provides a preliminary characterization of suitable areas for PV deployment, recommending further techno-economic investigation at smaller scales with additional criteria like aspect. |
| Ref. 11: Siting solar energy development to minimize biological impacts | This paper presented a spatial multi-criteria analysis method for modeling conflict risk between solar energy development and biodiversity conservation in California. The study identified compatible sites for solar energy as those that are of low conservation value and require minimal off-site impacts for transmission infrastructure connection. Results indicated sufficient compatible land exists in flat, non-urban areas of Californian deserts to meet the 2040 solar energy target of 8.7 gigawatts of installed capacity. |
| Ref. 12: GIS-based spatial analysis for large-scale solar power and transmission line issues: Case study of Wyoming, U.S. | This study presented a model combining geographical information systems and multi-criteria analysis to identify suitable locations for large-scale solar energy projects in Wyoming. The research overlaid solar resource data, population areas, and transmission line data with suitable location files, revealing that many suitable areas are close to cities and existing transmission lines. The study concluded that Wyoming has ample solar resources and transmission capacity to support solar energy projects for commercial and residential sectors. |
| Ref. 13: Minimizing habitat conflicts in meeting net-zero energy targets in the western United States | This study modeled high-resolution energy and land-use data to assess the implications of land and ocean use in achieving net-zero greenhouse gas emissions in the western US by 2050. The findings revealed that a "High Electrification" scenario most efficiently uses electricity generation and requires the least land and ocean area. Importantly, the research showed that implementing stronger land- and ocean-use protections to meet net-zero targets increases energy system costs by only 3%, while significantly reducing conflicts and habitat loss in high conservation value areas |
