# Supplementary material for: Practitioners’ perceptions of biodiversity-relevant criteria for solar suitability analyses in the United States
Source: Research Square preprint supplement (doi:10.21203/rs.3.rs-7437180/v1), 2025-09-26
Supplement: Supplementary file 3 [file e75577fb1b0020d1831a2e78.docx]

Supplementary Item 2: Inventory of biodiversity-relevant criteria used in solar suitability analysis-related studies from the United States as of 2023

| **BRC Examined** | **Round Decided** | **Data Source** | **Studies** |
| --- | --- | --- | --- |
| **National Parks** | 1 | PADUS | Ref. 1, Ref. 3, Ref. 4, Ref. 7, Ref. 9, Ref. 10, Ref. 13 |
| State-specific database | Ref. 5 |
| Solar Programmatic EIS Center | Ref. 11 |
| **State Parks** | 1 | PADUS | Ref. 1, Ref. 3, Ref. 4, Ref. 7, Ref. 9, Ref. 10, Ref. 13 |
| State-specific database | Ref. 5 |
| **National Monuments** | 1 | PADUS | Ref. 1, Ref. 3, Ref. 4, Ref. 7, Ref. 9, Ref. 10, Ref. 13 |
| National Historic Register | Ref. 5 |
| Solar Programmatic EIS Center | Ref. 11 |
| **Wilderness Areas** | 1 | PADUS | Ref. 1, Ref. 3, Ref. 4, Ref. 7, Ref. 9, Ref. 10, Ref. 13 |
| BLM Western Solar Plan | Ref. 5 |
| Solar Programmatic EIS Center | Ref. 11 |
| **National Wildlife Refuges** | 1 | PADUS | Ref. 1, Ref. 3, Ref. 4, Ref. 7, Ref. 9, Ref. 10, Ref. 13 |
| Solar Programmatic EIS Center | Ref. 11 |
| **Conservation Easements** | 1 | PADUS | Ref. 1, Ref. 3, Ref. 4, Ref. 7, Ref. 9, Ref. 10, Ref. 13 |
| National Conservation Easement database | Ref. 13 |
| **Threatened and Endangered Critical Habitat** | 1 | FWS critical habitat database | Ref. 4, Ref. 7, Ref. 11 |
| FWS Environmental Conservation Online System | Ref. 9 |
| WWWMP | Ref. 13 |
| **Areas of Critical Environmental Concern** | 1 | PADUS | Ref. 1, Ref. 3, Ref. 4, Ref. 7, Ref. 9, Ref. 10, Ref. 13 |
| Solar PEIS | Ref. 11 |
| WWWMP | Ref. 13 |
| **Habitat Conservation Plan Areas** | 1 | PADUS | Ref. 1, Ref. 3, Ref. 4, Ref. 7, Ref. 9, Ref. 10, Ref. 13 |
| Solar Programmatic EIS Center | Ref. 11 |
| **Habitat Management Areas for Threatened and Endangered Species** | 1 | State/region-specific database | Ref. 4 |
| FWS critical habitat database | Ref. 9, Ref. 13 |
| Solar Programmatic EIS Center | Ref. 11 |
| WWWMP | Ref. 13 |
| **Proximity to Important Bird Areas (IBAs)** | 2 | Audubon Important Bird Areas | Ref. 4, Ref. 9, Ref. 13 |
| **Presence of Species of Greatest Conservation Need** | 2 | State/region-specific database | Ref. 4, Ref. 13 |
| **Presence of Taxa of Interest** | 2 | NatureServe | Ref. 4, Ref. 13 |
| Solar Programmatic EIS Center | Ref. 11 |
| State/region-specific database | Ref. 13 |
| **Landscape Intactness** | 2 | Theobald human modification index (HMI) | Ref. 1 |
| The Disappearing West database | Ref. 4 |
| TNC Resilient & Connected Network | Ref. 13 |
| **Landscape Connectivity** | 3 | WWWMP | Ref. 4, |
| BLM Western Solar Plan | Ref. 5, |
| Solar Programmatic EIS Center | Ref. 11 |
| TNC Resilient & Connected Network | Ref. 13 |
| **Migratory Routes** | 3 | State/region-specific database | Ref. 13 |

All consensus core criteria come from rounds 1 and 2. References pertain to the following studies: Ref. 1: Patankar et al. 37; Ref. 2: Kwak et al. 20; Ref. 3: Katkar et al. 52; Ref. 4: Wu et al. 34; Ref. 5: Majumdar and Pasqualetti 54; Ref. 6: Hoffacker et al. 74; Ref. 7: Hernandez et al. 38; Ref. 8: Brewer et al. 35; Ref. 9: Wu et al. 53; Ref. 10: Tisza et al. 75; Ref. 11: Stoms et al. 76; Ref. 12: Hott et al. 36; Ref 13: Wu et. al. 33.
