# Supplementary material for: Practitioners’ perceptions of biodiversity-relevant criteria for solar suitability analyses in the United States
Source: Research Square preprint supplement (doi:10.21203/rs.3.rs-7437180/v1), 2025-09-26
Supplement: Supplementary file 4 [file f3a5df9e24f7b2b02a5efd65.docx]

Supplementary Item 1: BRC Definitions

| **Criterion** | **Definition** |
| --- | --- |
| National Parks | A type of legally protected area. Congressionally designated protected areas with legal protections against development within their borders. |
| State Parks | A type of legally protected area. State designated protected areas with legal protections against development within their borders. |
| National Monuments | A type of legally protected area. Executively or Congressionally designated protected areas with legal protections against development within their borders. |
| Wilderness Areas | A type of legally protected area. Congressionally designated protected areas with legal protections against development within their borders. Land must be be managed to uphold wilderness characteristics. |
| Inventoried Roadless Areas | A type of legally protected area. United States Forest Service lands that have been identified by government reviews as lands without existing roads that could be suitable for roadless area conservation as wilderness or other non-standard protections. Multiple use activities are still allowed in these areas, but the development of roads within them is limited. |
| National Wildlife Refuges | A type of legally protected area. Overseen by the US Fish and Wildlife Service, this is the system of public lands and waters set aside to conserve America's fish, wildlife, and plants. |
| Conservation Easements | A type of legally protected area. A voluntary, legal agreement that permanently limits uses of the land in order to protect its conservation values. |
| Threatened and Endangered Critical Habitat | This is a legal designation of protected habitat areas for such species defined by the Endangered Species Act. |
| Proximity to Cliffs | Distance to steep rock faces. Unique landscapes features such as these support unique biota, and thus their presence is relevant when siting solar infrastructure. |
| Proximity to Springs | Distance to locations where water wells up from an underground source. Unique landscapes features such as these support unique biota, and thus their presence is relevant when siting solar infrastructure. |
| Proximity to Riparian Areas | Distance to the interface between land and rivers or streams. Unique landscapes features such as these support unique biota, and thus their presence is relevant when siting solar infrastructure. |
| Proximity to Nesting Locations | Depending on the species, some nesting locations have formal protections while others do not. Wildlife use and aggregation areas such as these are vital for the persistence of various taxa in a landscape, and thus their presence is relevant when siting solar infrastructure. |
| Proximity to Important Bird Areas (IBA's) | IBA's, designated by BirdLife International, are distinct areas that provide essential habitat for one or more species of birds in breeding, wintering, or migration. Wildlife use and aggregation areas such as these are vital for the persistence of various taxa in a landscape, and thus their presence is relevant when siting solar infrastructure. |
| Proximity to Hibernacula | Distance to places where animals seek refuge. Wildlife use and aggregation areas such as these are vital for the persistence of various taxa in a landscape, and thus their presence is relevant when siting solar infrastructure. |
| Size of Facility Footprint Relative to Limited Habitat Types | The area of a solar facility’s footprint compared to the area of habitat types in the region the facility is likely to be located. This consideration is focused primarily on the extent to which solar development may displace rarer habitat types. |
| Habitat Diversity within and around Facility Footprint | Diversity of habitat classifications for the area within and around the footprint of a solar facility. |
| Habitat Type within and around Facility Footprint | Habitat classification for the area within and around the footprint of a solar facility. |
| Presence of Species of Greatest Conservation Need | Whether individuals of taxa identified as those in need of most urgent protection can be found within a study area. |
| Surface Hydrology | The study of surface water movement and the distribution of surface water in space and time. |
| Subsurface Hydrology | The study of belowground water movement and the distribution of surface water in space and time. |
| Presence of Taxa of Interest | Whether individuals of taxa of interest can be found within a study area. |
| Abundance of Taxa of Interest | How many individuals of taxa of interest can be found within a study area. |
| Distribution of Taxa of Interest | The geographical distribution of taxa of interest across a study area. |
| Range of Taxa of Interest | The area where taxa of interest are typically found during their lifetimes. |
| Diversity of Taxa of Interest | The number of different species that are represented across a study area. |
| Functional Diversity of Taxa of Interest | The value and range of functional traits within a study area. |
| Complementarity/Irreplaceability of Taxa of Interest | The extent to which taxa of interest in a study area utilize different niches, and the distinctness of the roles of taxa of interest within a study area--the fewer overlaps there are in ecological niches/roles played by the species, the higher the complementarity and irreplaceability. |
| Areas of Critical Environmental Concern | A Bureau of Land Management designation that highlights areas where special management attention is needed to protect important historical, cultural, and scenic values, or fish and wildlife or other natural resources. |
| Habitat Conservation Plan Areas | Habitat Conservation Plans are planning documents designed to accommodate economic development to the extent possible by authorizing the limited and unintentional take of species listed on the Endangered Species Act when it occurs incidental to otherwise lawful activities. |
| Habitat Management Areas for Threatened and Endangered Species | Areas managed mainly for conservation through management intervention designed to ensure the maintenance of habitats and to meet the requirements of specific species. |
| Species Identified in State Wildlife Action Plans | Whether individuals of taxa identified in State Wildlife Action Plans can be found within a study area. |
| Proximity to Forest | Distance to forest land-cover. Forests are used in this case as a proxy for landscapes with potentially high value to biodiversity. |
| Proximity to Wetlands | Distance to wetland land-cover. Wetlands are used in this case as a proxy for landscapes with potentially high value to biodiversity. |
| Proximity to Tallgrass Prairie | Distance to Tallgrass Prairie land-cover. Prairies are used in this case as a proxy for landscapes with potentially high value to biodiversity. |
| Land Use History | Locations that have previously been altered by humans may have less value for wildlife than those previously unaltered by humans. As a result, land use history is relevant when siting solar infrastructure. |
| Landscape Intactness | A quantifiable estimate of naturalness measured on a gradient of anthropogenic influence. |
| Landscape Fragmentation | The breaking up of larger areas of natural land cover into smaller, more isolated patches, independent of a change in the total area of natural land cover. |
| Proximity to Features that may Generate Barrier Effects | Barrier effects involve the impacts of linear infrastructure on the movement of terrestrial animals. This includes roads, fences, and other pieces of linear infrastructure. Solar energy development often requires the construction of road, fence, and transmission linear infrastructure. |
| Microclimate Diversity | The variety of microclimates present in a study area. The development and operation of a solar facility may alter the diversity of microclimates in a study area. |
| Landscape Connectivity | The degree to which the landscape facilitates or impedes movement among resource patches. The presence of solar facilities in a landscape may alter that landscape's connectivity. |
| Migratory Routes | The geographic route along which migratory animals may travel. The presence of a solar facility and removal of habitat within the facility could alter migratory movement for taxa of interest. |
| Flyways | Flight paths used by large numbers of birds while migrating between their breeding grounds and their overwintering quarters. It is possible that solar infrastructure may have some effect on avian species, as they may appear similar to a large body of water. In addition, construction in flyway stopover points could alter migratory pathways. |
| Local Movement Routes | Fine-scale movement data for taxa of interest in the study area. The presence of a solar facility and removal of habitat within the facility could alter movement for taxa of interest. |
| Projections of Future Range Maps for Taxa of Interest | The potential future area where taxa of interest may be found during their lifetimes. While solar infrastructure may not have a large impact on the ranges of taxa of interest in the present, that may change in the future. |
| Projections of Future Climate-Driven Land-Cover and Land-Use Changes | Potential changes to the land-use and land-cover of a landscape due to warming climates. While solar infrastructure may not have a large impact on certain land uses or land covers in the present, that may change in the future. |
| Soil Properties | Properties of soil include color, texture, structure, porosity, density, consistency, aggregate stability, and temperature. |
| Climate Resilience | The capacity of a landscape to be resilient in the face of a changing climate, typically measured in the availability of locations more likely to sustain native plants, animals, and natural processes into the future. Solar development could potentially alter a landscape and, in doing so, change its climate resilience. |
| Ecosystem Services | The capacity of a particular area to provide a specific bundle of ecosystem goods and services within a given time period. Solar development could potentially alter a landscape and, in doing so, change its capacity to supply certain ecosystem services. |
| Proximity to Vegetation | Distance to any vegetation. Vegetated areas are used in this case as a proxy for landscapes with potentially high value to biodiversity. |
